# Supplementary material
Source: PubMed Central journal article supplement (PMC6859250)
Supplement: mmc1.pdf [file mmc1.pdf]

## Sarcoidosis Diagnostic Score

### A Systematic Evaluation to Enhance the Diagnosis of Sarcoidosis

*Alexandra N. Bickett; Elyse E. Lower, MD; and Robert P. Baughman, MD*

CHEST 2018; 154(5):1052-1060

*Online supplements are not copyedited prior to posting and the author(s) take full responsibility for the accuracy of all data.*

© 2018 AMERICAN COLLEGE OF CHEST PHYSICIANS. Reproduction of this article is prohibited without written permission from the American College of Chest Physicians. See online for more details. DOI: 10.1016/j.chest.2018.05.003

**e-Table 1.**

| <b>ORGAN Biopsy</b>     | <b>HIGHLY PROBABLE</b>                                                                                                                                                                                                                                                                                                                                                                                        | <b>AT LEAST PROBABLE</b>                                                                                                                                                                                                                                                             | <b>POSSIBLE</b>                                               |
|-------------------------|---------------------------------------------------------------------------------------------------------------------------------------------------------------------------------------------------------------------------------------------------------------------------------------------------------------------------------------------------------------------------------------------------------------|--------------------------------------------------------------------------------------------------------------------------------------------------------------------------------------------------------------------------------------------------------------------------------------|---------------------------------------------------------------|
| LUNGS<br>Biopsy         | CXR: bilateral hilar adenopathy<br>Chest CT: perilymphatic nodules<br>Chest CT: symmetrical hilar/mediastinal adenopathy<br>PET/Gallium-67: mediastinal/hilar enhancement                                                                                                                                                                                                                                     | CXR: diffuse infiltrates<br>CXR: upper lobe fibrosis<br>Chest CT: peribronchial thickening<br>BAL: lymphocytic alveolitis<br>BAL: elevated CD4/CD8 ratio<br>PET/Gallium-67: diffuse parenchymal lung enhancement<br>TBNA: lymphoid aggregates/giant cells                            | CXR: localized infiltrate<br><br>PFT: obstruction             |
| NEUROLOGIC<br>Biopsy    | Clinical syndrome consistent with granulomatous inflammation of the meninges, brain, ventricular (CSF) system, cranial nerves, pituitary gland, spinal cord, cerebral vasculature or nerve roots<br>And<br>An abnormal MRI characteristic of neurosarcoidosis, defined as exhibiting abnormal enhancement following the administration of gadolinium or a cerebrospinal fluid exam demonstrating inflammation | Isolated facial palsy, negative MRI<br>Clinical syndrome consistent with granulomatous inflammation of the meninges, brain, ventricular (CSF) system, cranial nerves, pituitary gland, spinal cord, cerebral vasculature, nerve roots but without characteristic MRI or CSF findings | Seizures, negative MRI<br><br>Cognitive decline, negative MRI |
| NON-THORACIC LYMPH NODE |                                                                                                                                                                                                                                                                                                                                                                                                               | Multiple enlarged palpable cervical or epitrochelar lymph                                                                                                                                                                                                                            |                                                               |

|                   |              |                                                                                                                                                                                                                                                                                                                                                                                             |                                                                                           |
|-------------------|--------------|---------------------------------------------------------------------------------------------------------------------------------------------------------------------------------------------------------------------------------------------------------------------------------------------------------------------------------------------------------------------------------------------|-------------------------------------------------------------------------------------------|
| Biopsy            |              | nodes without B symptoms<br>Enlarged lymph nodes identified by imaging in at least 2 peripheral or visceral lymph node stations without B symptoms                                                                                                                                                                                                                                          |                                                                                           |
| RENAL<br>Biopsy   |              | Treatment-responsive renal failure with no other risk factors.<br>Treatment-responsive renal failure in patient with diabetes and/or hypertension.                                                                                                                                                                                                                                          | Renal failure with other potential risk factors                                           |
| CARDIAC<br>Biopsy |              | Treatment responsive CM or AVNB<br>Reduced LVEF in the absence of other clinical risk factors<br>Spontaneous or inducible sustained VT with no other risk factor<br>Mobitz type II or 3rd degree heart block<br>Patchy uptake on dedicated cardiac PET<br>Delayed enhancement on CMR<br>Positive gallium uptake<br>Defect on perfusion scintigraphy or SPECT scan<br>T2 prolongation on CMR | Reduced LVEF in the presence of other risk factors (e.g., HTN, DM)<br>Atrial dysrhythmias |
| SKIN<br>Biopsy    | Lupus pernio | Subcutaneous nodules or plaques<br>Inflammatory papules within a scar or tattoo<br>Violaceous or erythematous annular lesions<br>Violaceous or erythematous macular,                                                                                                                                                                                                                        | Atypical lesions: ulcerative, erythrodermic, alopecic, ichthyosiform                      |

|                               |                                                                                                                           |                                                                                                                                                                             |                                 |
|-------------------------------|---------------------------------------------------------------------------------------------------------------------------|-----------------------------------------------------------------------------------------------------------------------------------------------------------------------------|---------------------------------|
|                               |                                                                                                                           | papular lesions around the eyes, nose, or mouth                                                                                                                             |                                 |
| EYES<br>Biopsy                | uveitis<br>optic neuritis<br>mutton fat keratic precipitates<br>iris nodules<br>snowball/string of pearls (pars planitis) | lacrimal gland swelling<br>trabecular meshwork nodules<br>retinitis<br>scleritis<br>multiple chorioretinal peripheral lesions<br>adnexal nodularity<br>candle wax drippings | cataract<br>glaucoma<br>red eye |
| LIVER<br>Biopsy               |                                                                                                                           | Abdominal imaging demonstrating hepatomegaly<br>Abdominal imaging demonstrating hepatic nodules                                                                             |                                 |
| BONE MARROW<br>Biopsy         | PET displaying diffuse uptake                                                                                             |                                                                                                                                                                             |                                 |
| SPLEEN<br>Biopsy              |                                                                                                                           | Low attenuation nodules on CT<br>PET/gallium-67 uptake in splenic nodules<br>Splenomegaly on imaging or physical examination                                                |                                 |
| BONE / JOINTS<br>Biopsy       | Typical radiographic features (trabecular pattern, osteolysis, cysts/punched out lesions)                                 | Dactylitis<br>Nodular tenosynovitis<br>Positive PET, MRI, or gallium-67 bone imaging                                                                                        | Arthralgias                     |
| EAR / NOSE / THROAT<br>Biopsy |                                                                                                                           | Granulomatous changes on direct laryngoscopy<br>Consistent imaging studies (e.g. sinonasal erosion, mucoperiosteal thickening, positive PET scan)                           | chronic sinusitis               |

|                                                       |                                                                                                                                                                                                                                                                                                                                                                                       |                                                                                                                                                                                                                                                                                                                                                                       |                                       |
|-------------------------------------------------------|---------------------------------------------------------------------------------------------------------------------------------------------------------------------------------------------------------------------------------------------------------------------------------------------------------------------------------------------------------------------------------------|-----------------------------------------------------------------------------------------------------------------------------------------------------------------------------------------------------------------------------------------------------------------------------------------------------------------------------------------------------------------------|---------------------------------------|
| PAROTID /<br>SALIVARY<br>GLANDS<br>Biopsy             | Positive gallium-67<br>scan ("Panda sign")<br>Positive PET scan of<br>the parotid glands                                                                                                                                                                                                                                                                                              | Symmetrical parotitis<br>with syndrome of<br>mumps<br>Enlarged salivary<br>glands                                                                                                                                                                                                                                                                                     | Dry mouth                             |
| MUSCLES<br>Biopsy                                     |                                                                                                                                                                                                                                                                                                                                                                                       | Positive imaging (MRI,<br>Gallium-67)<br>Palpable muscle<br>masses                                                                                                                                                                                                                                                                                                    | Myalgias                              |
| HYPERCALCEMIA /<br>HYPERCALCURIA /<br>NEPHROLITHIASIS | hypercalcemia plus all<br>of the following: a) a<br>normal serum PTH<br>level;<br>b) a normal or<br>increased 1,25-OH<br>dyhydroxy vitamin D<br>level;<br>c) a low 25-OH vitamin<br>D level<br>hypercalciuria plus all<br>of the following: a) a<br>normal serum PTH<br>level; b) a normal or<br>increased 1,25-OH<br>dyhydroxy vitamin D<br>level; c) a low 25-OH<br>vitamin D level | nephrolithiasis plus all<br>of the following:<br>a) a normal serum<br>PTH level;<br>b) a normal or<br>increased 1,25-diOH<br>vitamin D level;<br>c) a low 25-OH<br>vitamin D level<br>hypercalciuria without<br>serum PTH and 25 and<br>1,25 vitamin D levels<br><br>nephrolithiasis with<br>calcium stones, without<br>serum PTH and 25 and<br>1,25 vitamin D levels | Nephrolithiasis, no<br>stone analysis |

Adapted from Judson MA, Costabel U, Drent M et al. The WASOG Sarcoidosis Organ Assessment Instrument: An update of a previous clinical tool. *Sarcoidosis Vasc Diffuse Lung Dis* 2014;31:19-27.
